# Supplementary material
Source: Royal Society of Chemistry journal article supplement (doi:10.1039/d6cp00527f)
Supplement: d6cp00527f1.pdf [file d6cp00527f1.pdf]

# Molecular View on Lignin Fractionation in Organic-water Co-solvent: Effect of the Ratio of Van Der Waals over Electrostatic of Lignin-Solvent Interactions

*Chenyu Ge<sup>a</sup>, Juan Zhao<sup>a</sup>, Ruoyu Zhang<sup>a</sup> and Changwei Hu<sup>a,\*</sup>*

<sup>a</sup>Key Laboratory of Green Chemistry and Technology, Ministry of Education; National and Local Joint Engineering Laboratory of Energy Plant Biofuel Preparation and Utilization, College of Chemistry, Sichuan University, Chengdu, Sichuan, P. R. China, 610064.

**Table S1-Table S8**

**Figure S1-Figure S18**

**Reference**

**Table S1.** The lignin removal rate in water, organic and organic-water co-solvent according to previous experimental results (473.15 K, 2 MPa).<sup>1, 2</sup>

| Solvent                       | Lignin Removal Rate |
|-------------------------------|---------------------|
| GBL-H <sub>2</sub> O (v7/v3)  | 0.96                |
| GVL-H <sub>2</sub> O (v7/v3)  | 0.93                |
| THF-H <sub>2</sub> O (v7/v3)  | 0.9                 |
| THF-H <sub>2</sub> O (v6/v4)  | 0.9                 |
| EAC-H <sub>2</sub> O (v7/v3)  | 0.88                |
| MTHF-H <sub>2</sub> O (v7/v3) | 0.73                |
| GBL                           | 0.67                |
| GVL                           | 0.62                |
| THF                           | 0.4                 |
| EAC                           | 0.28                |
| MTHF                          | 0.28                |
| H <sub>2</sub> O              | 0.12                |

**Table S2.** Average H-bond number of lignin model LG1 in different solvents.

| Solvent                          | Lignin-Lignin | Lignin-Solvent | Lignin-Organic | Lignin-Water |
|----------------------------------|---------------|----------------|----------------|--------------|
| GBL-H <sub>2</sub> O<br>(v7/v3)  | 8.9           | 33.5           | 9.0            | 24.5         |
| GVL-H <sub>2</sub> O<br>(v7/v3)  | 9.1           | 34.4           | 7.8            | 26.6         |
| THF-H <sub>2</sub> O<br>(v7/v3)  | 9.9           | 34.4           | 2.9            | 31.4         |
| THF-H <sub>2</sub> O<br>(v6/v4)  | 9.5           | 37.6           | 2.7            | 34.9         |
| EAC-H <sub>2</sub> O<br>(v7/v3)  | 9.2           | 31.0           | 7.5            | 23.4         |
| MTHF-H <sub>2</sub> O<br>(v7/v3) | 9.5           | 36.8           | 3.8            | 32.9         |
| GBL                              | 8.5           | 15.8           | 15.8           | 0.0          |
| GVL                              | 9.3           | 15.6           | 15.6           | 0.0          |
| THF                              | 12.7          | 4.8            | 4.8            | 0.0          |
| EAC                              | 9.6           | 13.7           | 13.7           | 0.0          |
| MTHF                             | 12.5          | 6.1            | 6.1            | 0.0          |
| H <sub>2</sub> O                 | 8.6           | 60.1           | 0.0            | 60.1         |

**Table S3.** Average H-bond number of lignin model LG2 in different solvents.

| Solvent                          | Lignin-Lignin | Lignin-Solvent | Lignin-Organic | Lignin-Water |
|----------------------------------|---------------|----------------|----------------|--------------|
| GBL-H <sub>2</sub> O<br>(v7/v3)  | 7.6           | 30.4           | 7.6            | 22.8         |
| GVL-H <sub>2</sub> O<br>(v7/v3)  | 7.3           | 30.7           | 7.1            | 23.6         |
| THF-H <sub>2</sub> O<br>(v7/v3)  | 8.2           | 33.7           | 2.4            | 31.3         |
| THF-H <sub>2</sub> O<br>(v6/v4)  | 8.5           | 24.7           | 3.0            | 21.7         |
| EAC-H <sub>2</sub> O<br>(v7/v3)  | 7.3           | 28.7           | 6.7            | 22.0         |
| MTHF-H <sub>2</sub> O<br>(v7/v3) | 8.3           | 31.4           | 3.2            | 28.2         |
| GBL                              | 7.1           | 15.7           | 15.7           | 0.0          |
| GVL                              | 8.0           | 13.6           | 13.6           | 0.0          |
| THF                              | 11.0          | 4.2            | 4.2            | 0.0          |
| EAC                              | 8.0           | 12.2           | 12.2           | 0.0          |
| MTHF                             | 10.6          | 5.6            | 5.6            | 0.0          |
| H <sub>2</sub> O                 | 6.8           | 54.7           | 0.0            | 54.7         |

**Table S4.** Average H-bond number of lignin model LG3 in different solvents.

| Solvent                          | Lignin-Lignin | Lignin-Solvent | Lignin-Organic | Lignin-Water |
|----------------------------------|---------------|----------------|----------------|--------------|
| GBL-H <sub>2</sub> O<br>(v7/v3)  | 5.8           | 29.3           | 7.4            | 21.9         |
| GVL-H <sub>2</sub> O<br>(v7/v3)  | 6.4           | 28.6           | 6.1            | 22.4         |
| THF-H <sub>2</sub> O<br>(v7/v3)  | 6.8           | 32.4           | 2.3            | 30.1         |
| THF-H <sub>2</sub> O<br>(v6/v4)  | 6.7           | 32.2           | 2.3            | 30.0         |
| EAC-H <sub>2</sub> O<br>(v7/v3)  | 6.9           | 24.2           | 6.2            | 18.0         |
| MTHF-H <sub>2</sub> O<br>(v7/v3) | 7.4           | 26.6           | 2.9            | 23.7         |
| GBL                              | 6.1           | 14.7           | 14.7           | 0.0          |
| GVL                              | 7.2           | 12.5           | 12.5           | 0.0          |
| THF                              | 8.7           | 5.8            | 5.8            | 0.0          |
| EAC                              | 6.5           | 12.2           | 12.2           | 0.0          |
| MTHF                             | 9.2           | 5.6            | 5.6            | 0.0          |
| H <sub>2</sub> O                 | 6.7           | 48.3           | 0.0            | 48.3         |

**Table S5.** Average H-bond number of lignin model LG4 in different solvents.

| Solvent                          | Lignin-Lignin | Lignin-Solvent | Lignin-Organic | Lignin-Water |
|----------------------------------|---------------|----------------|----------------|--------------|
| GBL-H <sub>2</sub> O<br>(v7/v3)  | 5.1           | 23.5           | 5.8            | 17.7         |
| GVL-H <sub>2</sub> O<br>(v7/v3)  | 5.6           | 22.5           | 5.4            | 17.0         |
| THF-H <sub>2</sub> O<br>(v7/v3)  | 6.1           | 23.2           | 1.9            | 21.3         |
| THF-H <sub>2</sub> O<br>(v6/v4)  | 5.5           | 27.3           | 1.7            | 25.6         |
| EAC-H <sub>2</sub> O<br>(v7/v3)  | 5.5           | 21.0           | 5.2            | 15.9         |
| MTHF-H <sub>2</sub> O<br>(v7/v3) | 6.3           | 20.5           | 2.6            | 17.9         |
| GBL                              | 5.0           | 11.7           | 11.7           | 0.0          |
| GVL                              | 5.6           | 10.3           | 10.3           | 0.0          |
| THF                              | 8.2           | 3.1            | 3.1            | 0.0          |
| EAC                              | 5.8           | 9.1            | 9.1            | 0.0          |
| MTHF                             | 7.2           | 4.4            | 4.4            | 0.0          |
| H <sub>2</sub> O                 | 5.1           | 43.4           | 0.0            | 43.4         |

**Table S6.** Average H-bond number of lignin model LG5 in different solvents.

| Solvent                          | Lignin-Lignin | Lignin-Solvent | Lignin-Organic | Lignin-Water |
|----------------------------------|---------------|----------------|----------------|--------------|
| GBL-H <sub>2</sub> O<br>(v7/v3)  | 4.2           | 23.4           | 5.9            | 17.6         |
| GVL-H <sub>2</sub> O<br>(v7/v3)  | 4.5           | 22.7           | 5.0            | 17.7         |
| THF-H <sub>2</sub> O<br>(v7/v3)  | 5.2           | 24.4           | 1.7            | 22.8         |
| THF-H <sub>2</sub> O<br>(v6/v4)  | 5.5           | 24.5           | 1.7            | 22.9         |
| EAC-H <sub>2</sub> O<br>(v7/v3)  | 5.3           | 20.3           | 4.5            | 15.8         |
| MTHF-H <sub>2</sub> O<br>(v7/v3) | 5.4           | 23.1           | 2.1            | 20.9         |
| GBL                              | 4.6           | 10.5           | 10.5           | 0.0          |
| GVL                              | 4.9           | 10.1           | 10.1           | 0.0          |
| THF                              | 8.1           | 3.1            | 3.1            | 0.0          |
| EAC                              | 5.1           | 9.7            | 9.7            | 0.0          |
| MTHF                             | 6.4           | 5.2            | 5.2            | 0.0          |
| H <sub>2</sub> O                 | 4.3           | 40.2           | 0.0            | 40.2         |

**Table S7.** Energy decomposition analysis for weak interaction with typical lignin dimers ( $\beta$ -O-4,  $\beta$ - $\beta$ ,  $\beta$ -5) and typical solvent molecules (kcal/mol).

| Items | Molecules                               | Electrostatic<br>$\Delta E_{elec}$ | Dispersion<br>$\Delta E_{disp}$ | Exchange-<br>repulsion | Orbital<br>$\Delta E_{orb}$ | Total<br>Energy | $\Delta E_{disp}/\Delta E_{elec}$ |
|-------|-----------------------------------------|------------------------------------|---------------------------------|------------------------|-----------------------------|-----------------|-----------------------------------|
| a     | $\beta$ - $\beta$ ... $\beta$ - $\beta$ | -14.18                             | -30.73                          | 37.31                  | -4.84                       | -12.44          | <b>2.17</b>                       |
| b     | $\beta$ -O-4... $\beta$ -O-4            | -13.65                             | -28.13                          | 34.05                  | -5.76                       | -13.49          | <b>2.06</b>                       |
| c     | $\beta$ -5... $\beta$ -5                | -10.10                             | -28.27                          | 31.32                  | -5.03                       | -12.10          | <b>2.80</b>                       |
| d     | $\beta$ -5... $\beta$ -5                | -20.50                             | -22.44                          | 37.19                  | -8.72                       | -14.47          | <b>1.09</b>                       |
| e     | $\beta$ - $\beta$ ...H <sub>2</sub> O   | -12.11                             | -8.96                           | 18.89                  | -5.38                       | -7.56           | <b>0.74</b>                       |
| f     | $\beta$ -5...H <sub>2</sub> O           | -11.64                             | -5.37                           | 15.52                  | -4.12                       | -5.61           | <b>0.46</b>                       |
| g     | $\beta$ -5...THF                        | -14.65                             | -10.80                          | 22.11                  | -6.62                       | -9.95           | <b>0.74</b>                       |
| h     | $\beta$ - $\beta$ ...GBL                | -13.56                             | -15.72                          | 23.07                  | -4.52                       | -10.74          | <b>1.76</b>                       |
| i     | $\beta$ -O-4...GBL                      | -6.45                              | -11.33                          | 17.02                  | -3.05                       | -3.82           | <b>2.01</b>                       |
| j     | $\beta$ -5...THF                        | -6.56                              | -13.19                          | 16.71                  | -2.43                       | -5.46           | <b>1.16</b>                       |

**Table S8.** The proportion of  $E_{\text{vdw}}$  in Lignin-Solvent interaction for the six lignin dimer models with DES based on previous work.<sup>3</sup>

| Lignin Dimers                     | Solvents | Interaction Energy |          |          | Proportion of $E_{\text{vdw}}$ |
|-----------------------------------|----------|--------------------|----------|----------|--------------------------------|
|                                   |          | vdW                | coulomb  | total    |                                |
| $\beta$ -5                        | 3c-DES-0 | -238.327           | -167.357 | -405.684 | <b>0.587</b>                   |
|                                   | 3c-DES-2 | -235.715           | -170.945 | -406.660 | <b>0.580</b>                   |
|                                   | 3c-DES-4 | -238.362           | -184.024 | -422.386 | <b>0.564</b>                   |
|                                   | 3c-DES-6 | -254.319           | -169.739 | -424.058 | <b>0.600</b>                   |
| $\beta$ -1                        | 3c-DES-0 | -261.003           | -169.269 | -430.272 | <b>0.607</b>                   |
|                                   | 3c-DES-2 | -252.587           | -190.407 | -442.994 | <b>0.570</b>                   |
|                                   | 3c-DES-4 | -259.617           | -186.516 | -446.133 | <b>0.582</b>                   |
|                                   | 3c-DES-6 | -260.383           | -185.406 | -445.789 | <b>0.584</b>                   |
| $\beta$ -O-4                      | 3c-DES-0 | -236.988           | -150.843 | -387.831 | <b>0.611</b>                   |
|                                   | 3c-DES-2 | -236.165           | -151.398 | -387.563 | <b>0.609</b>                   |
|                                   | 3c-DES-4 | -235.130           | -161.770 | -396.900 | <b>0.592</b>                   |
|                                   | 3c-DES-6 | -228.132           | -170.456 | -398.588 | <b>0.572</b>                   |
| $\beta$ - $\beta$                 | 3c-DES-0 | -299.452           | -153.236 | -452.688 | <b>0.661</b>                   |
|                                   | 3c-DES-2 | -297.210           | -155.020 | -452.230 | <b>0.657</b>                   |
|                                   | 3c-DES-4 | -298.852           | -162.933 | -461.785 | <b>0.647</b>                   |
|                                   | 3c-DES-6 | -298.171           | -188.527 | -486.698 | <b>0.613</b>                   |
| $\beta$ - $\beta$ -2 $\gamma$ -OH | 3c-DES-0 | -292.077           | -227.911 | -519.988 | <b>0.562</b>                   |
|                                   | 3c-DES-2 | -291.465           | -239.199 | -530.664 | <b>0.549</b>                   |
|                                   | 3c-DES-4 | -283.586           | -239.064 | -522.650 | <b>0.543</b>                   |
|                                   | 3c-DES-6 | -288.947           | -239.182 | -528.129 | <b>0.547</b>                   |
| $\beta$ - $\beta$ -2pCA           | 3c-DES-0 | -461.576           | -315.900 | -777.476 | <b>0.594</b>                   |
|                                   | 3c-DES-2 | -469.783           | -332.205 | -801.988 | <b>0.586</b>                   |
|                                   | 3c-DES-4 | -478.988           | -337.154 | -816.142 | <b>0.587</b>                   |
|                                   | 3c-DES-6 | -466.786           | -387.582 | -854.368 | <b>0.546</b>                   |

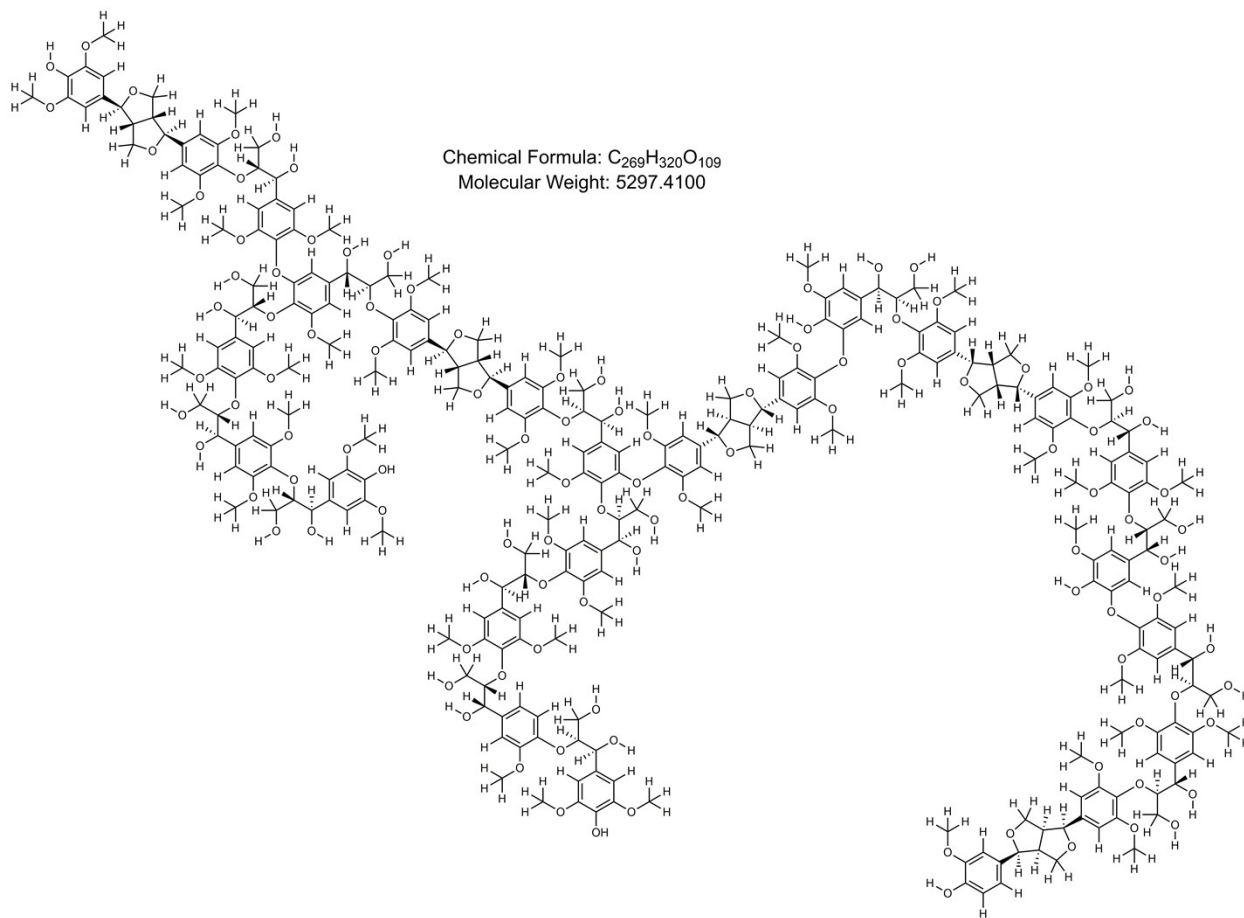

**Figure S1.** The chemical structure of lignin model LG1.

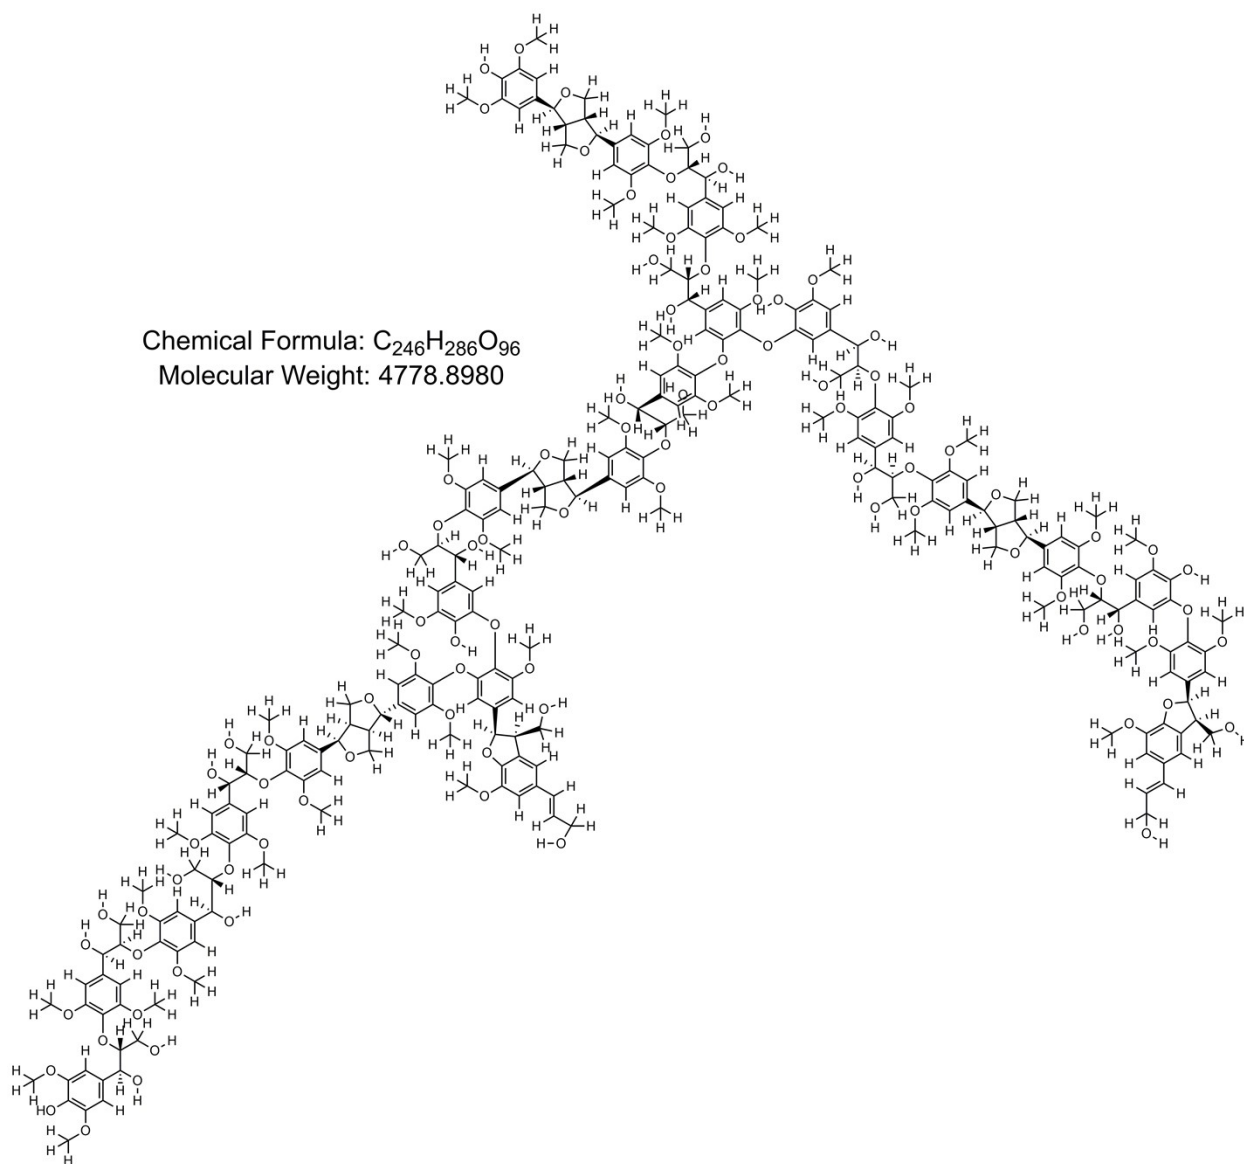

**Figure S2.** The chemical structure of lignin model LG2.

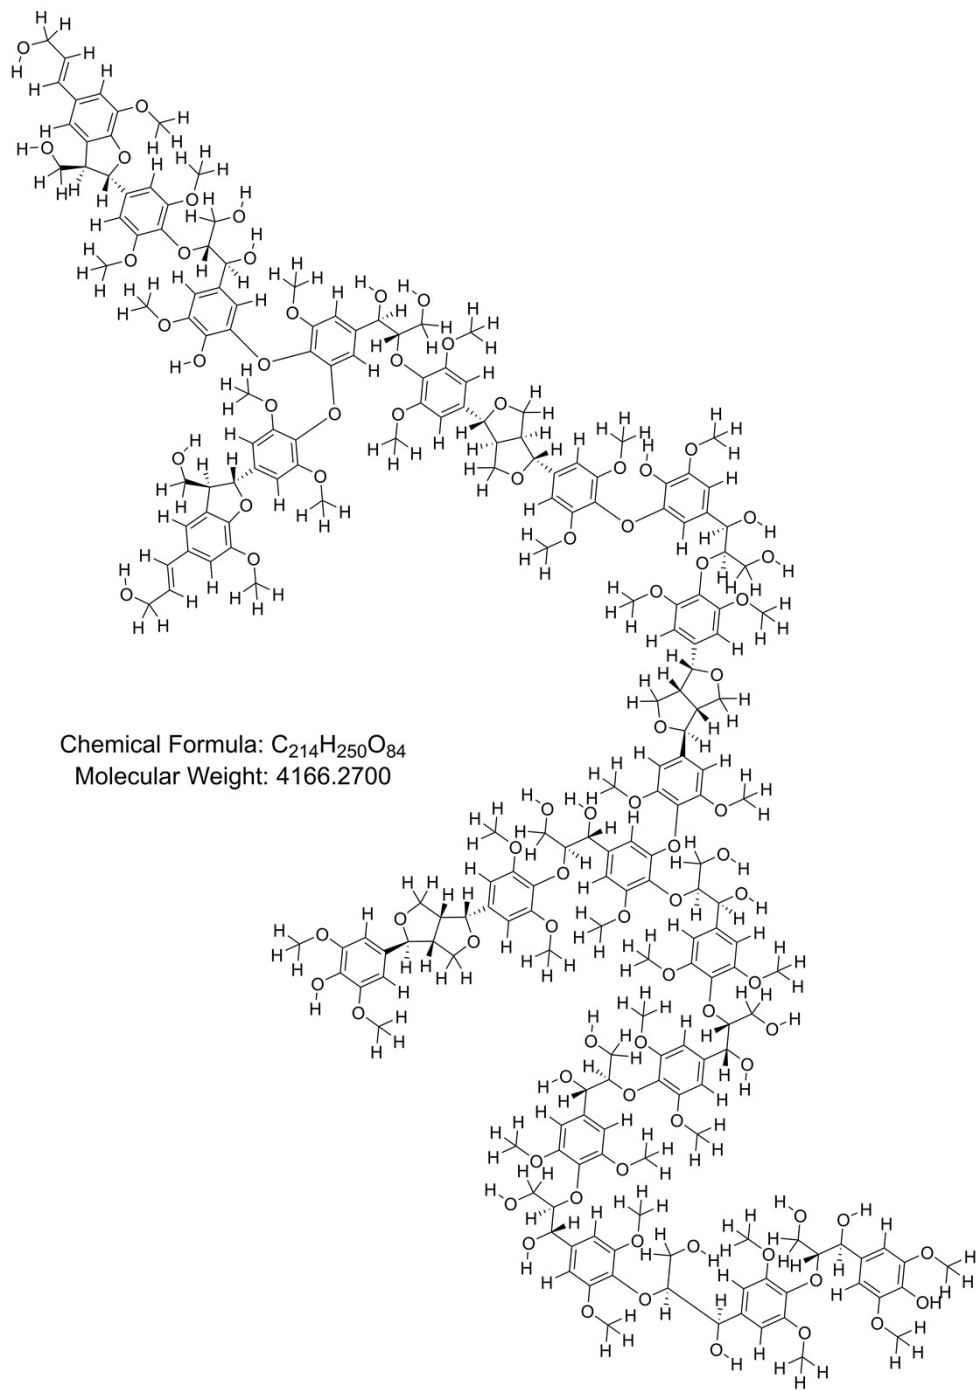

**Figure S3.** The chemical structure of lignin model LG3.

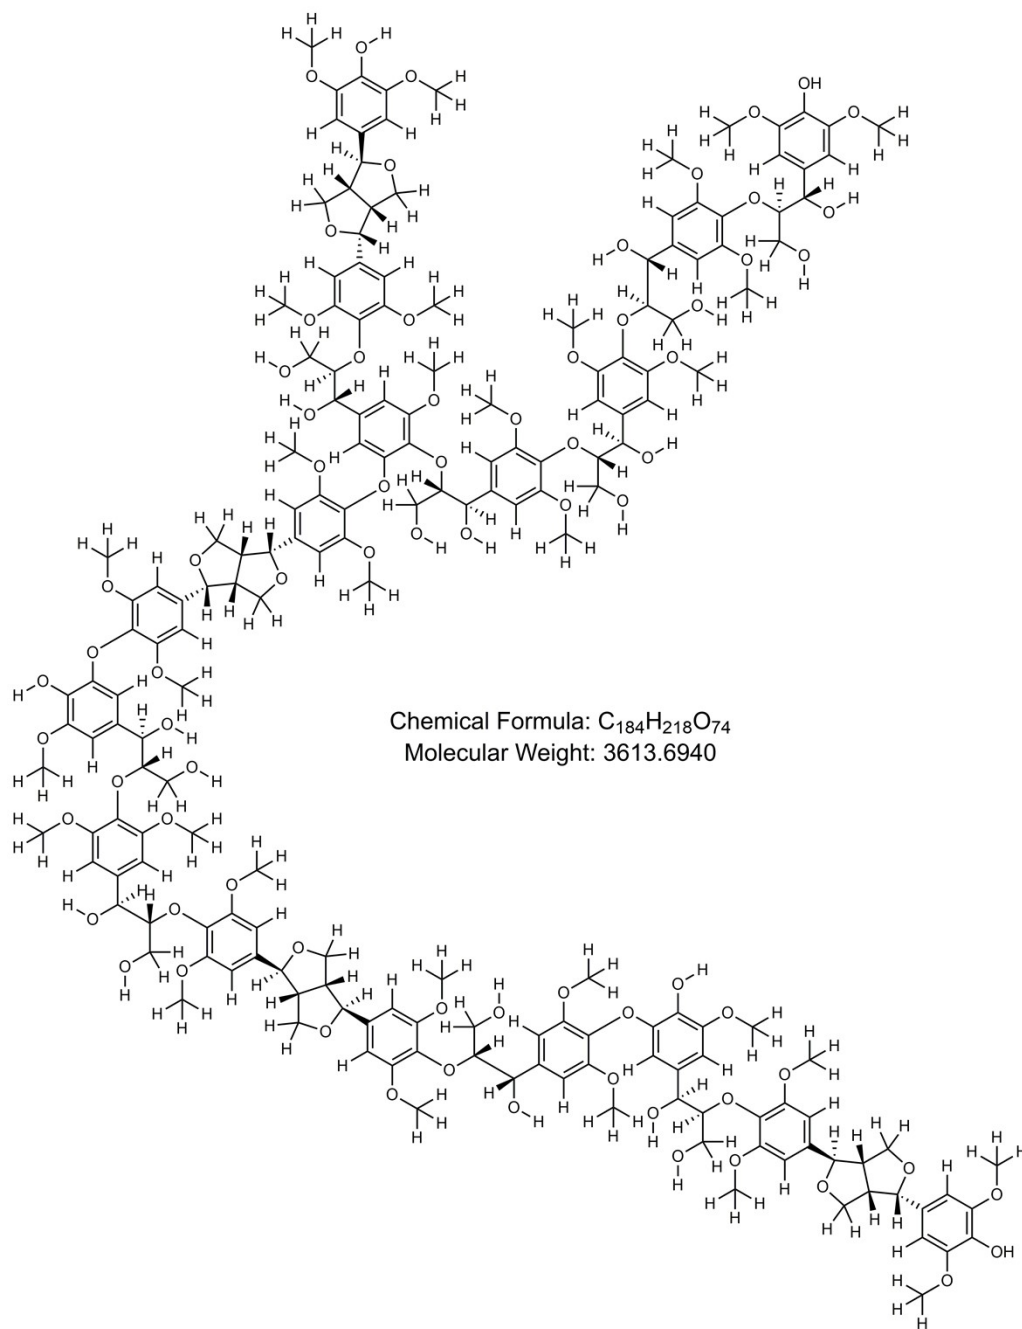

**Figure S4.** The chemical structure of lignin model LG4.

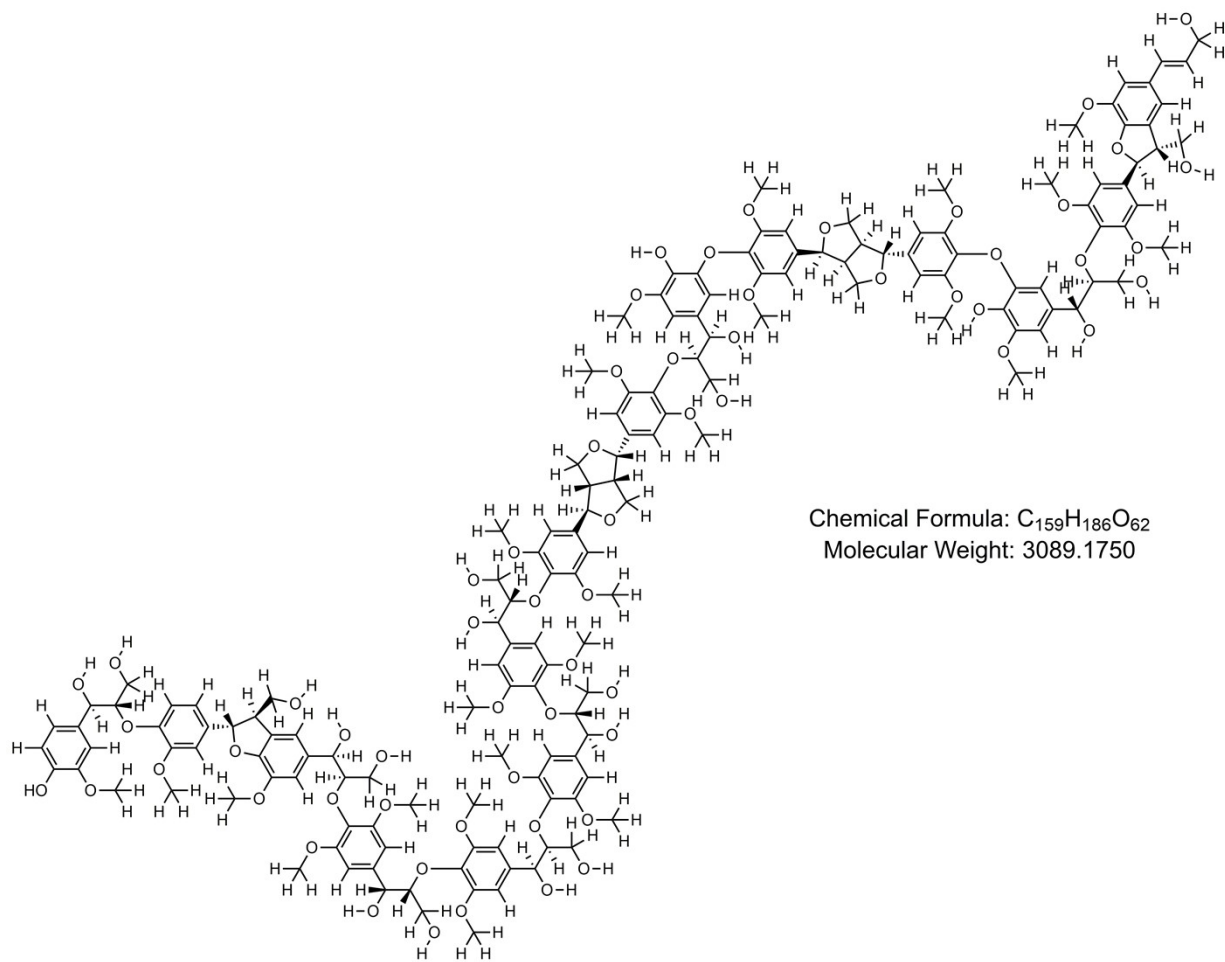

**Figure S5.** The chemical structure of lignin model LG5.

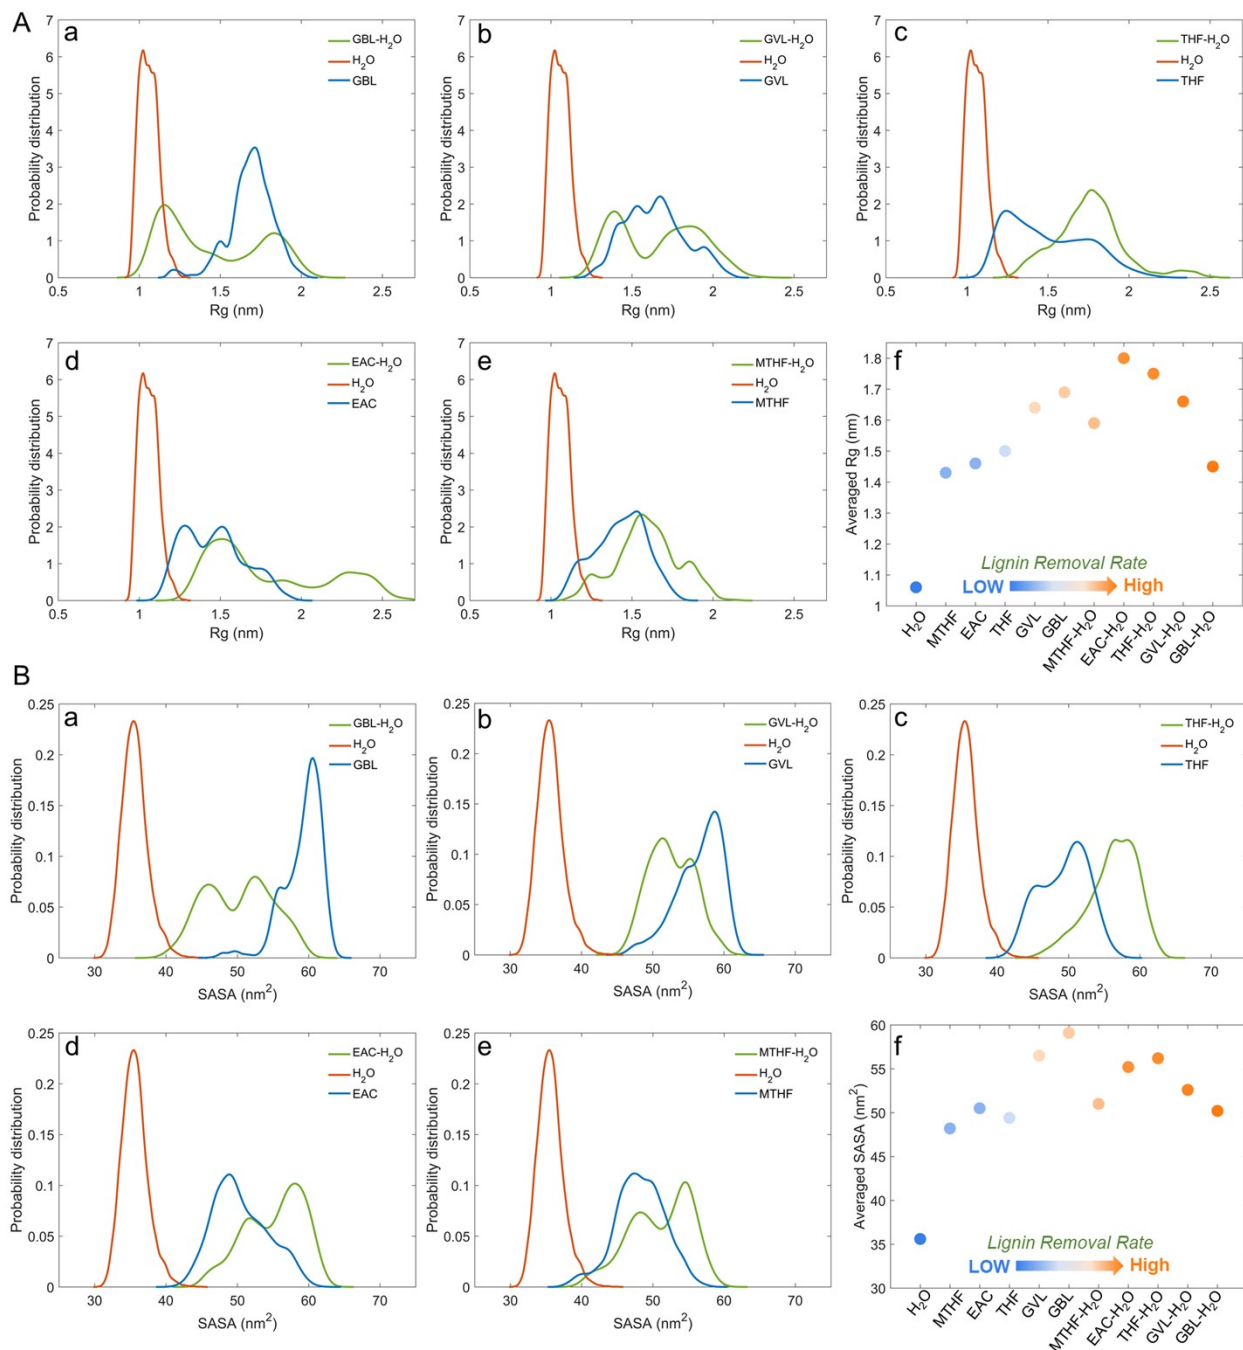

**Figure S6.** **A.** The probability distribution of Rg of lignin model chain LG2 in different solvents during 10 ns Production MD simulation. **B.** The probability distribution of SASA of lignin model chain LG2 in different solvents during 10 ns Production MD simulation. **a.** Organic part: GBL. **b.** Organic part: GVL. **c.** Organic part: THF. **d.** EAC. **e.** MTHF. The volume ratio of co-solvent was 7:3 (organic part: water). **f.** Averaged Rg/SASA in different solvent with the relative experimental lignin removal rate.

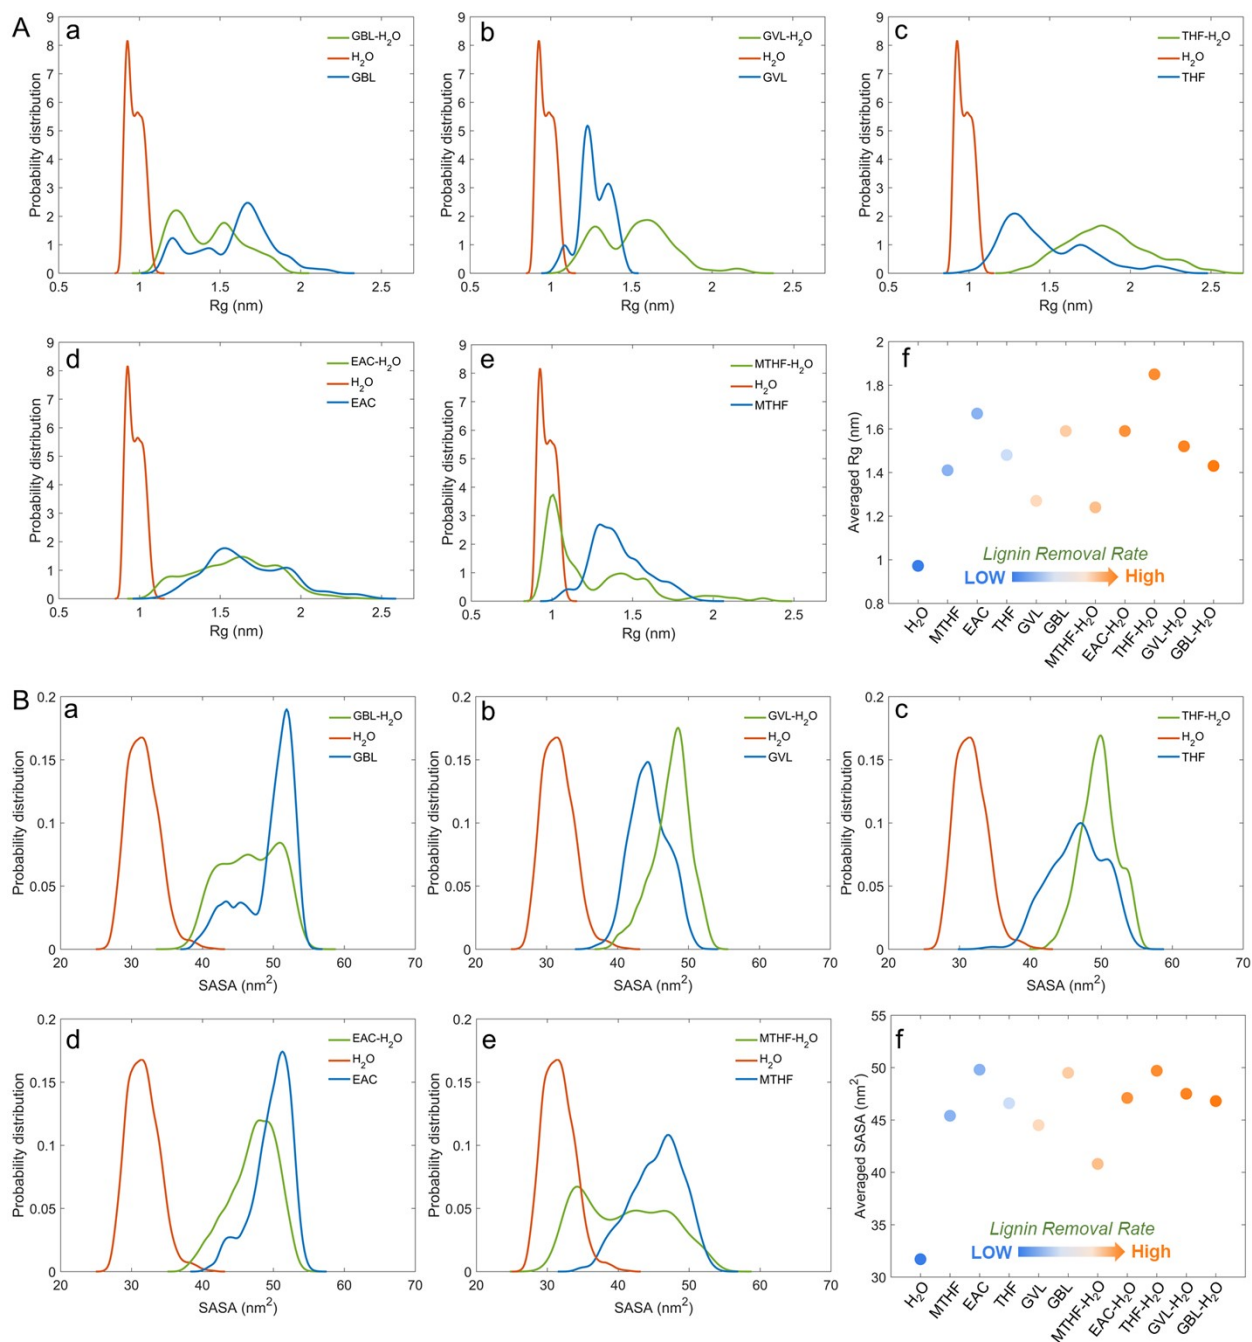

**Figure S7. A.** The probability distribution of Rg of lignin model chain LG3 in different solvents during 10 ns Production MD simulation. **B.** The probability distribution of SASA of lignin model chain LG3 in different solvents during 10 ns Production MD simulation. **a.** Organic part: GBL. **b.** Organic part: GVL. **c.** Organic part: THF. **d.** EAC. **e.** MTHF. The volume ratio of co-solvent was 7:3 (organic part: water). **f.** Averaged Rg/SASA in different solvent with the relative experimental lignin removal rate.

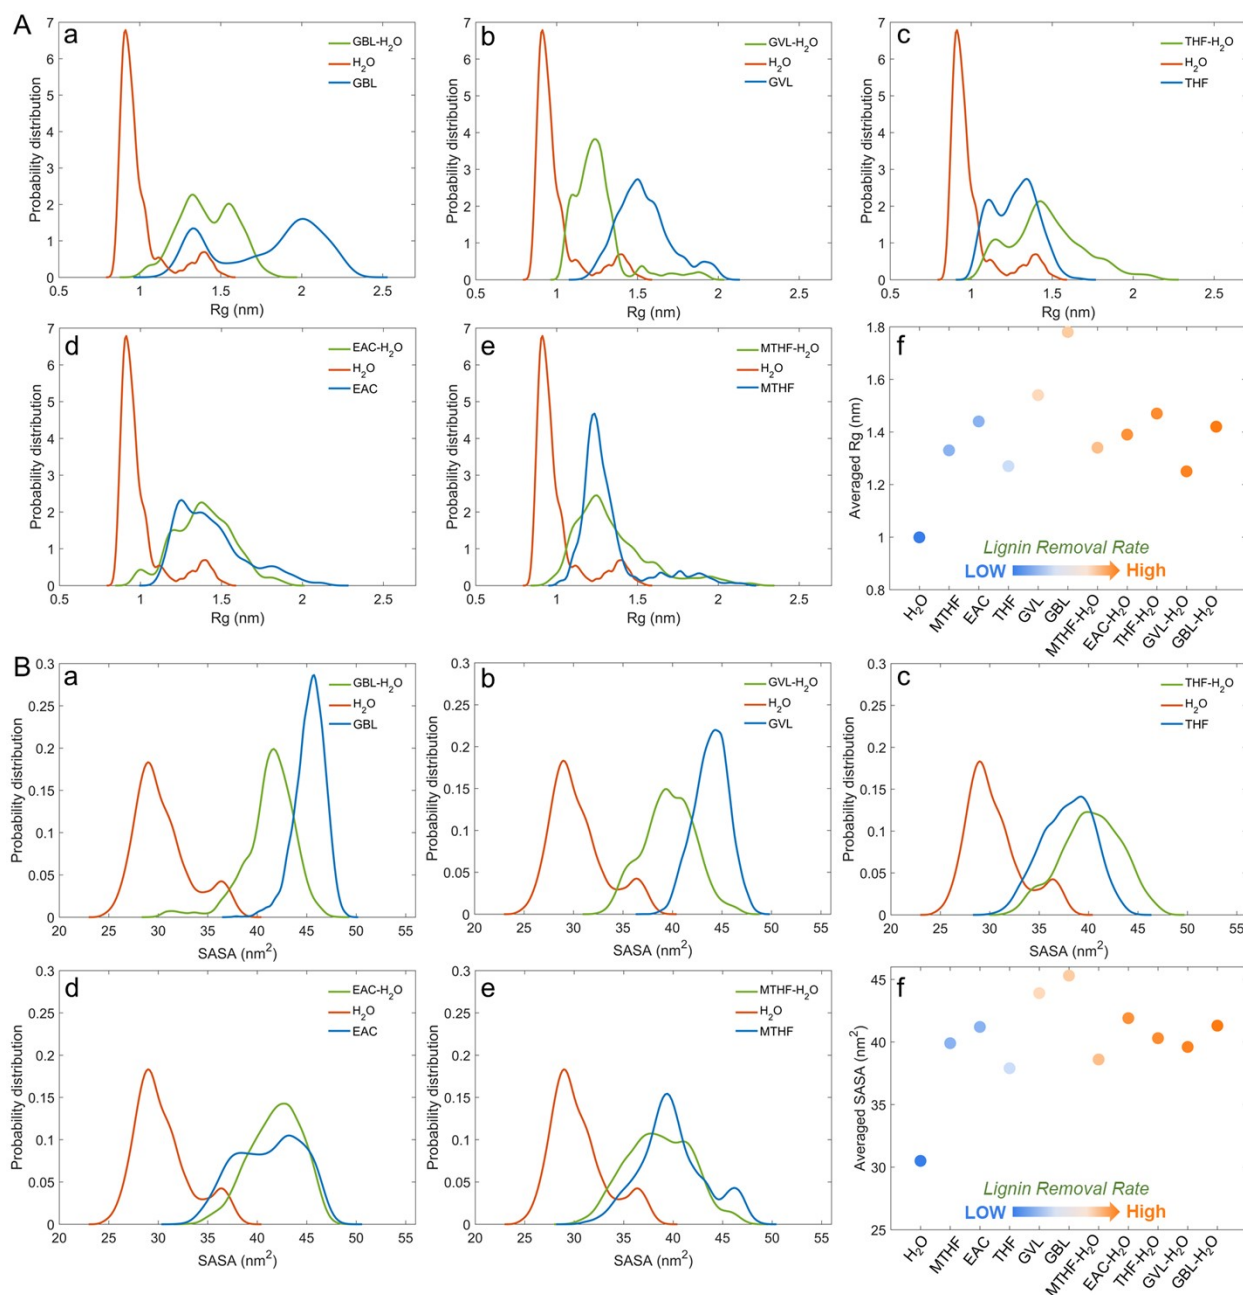

**Figure S8. A.** The probability distribution of Rg of lignin model chain LG4 in different solvents during 10 ns Production MD simulation. **B.** The probability distribution of SASA of lignin model chain LG4 in different solvents during 10 ns Production MD simulation. **a.** Organic part: GBL. **b.** Organic part: GVL. **c.** Organic part: THF. **d.** EAC. **e.** MTHF. The volume ratio of co-solvent was 7:3 (organic part: water). **f.** Averaged Rg/SASA in different solvent with the relative experimental lignin removal rate.

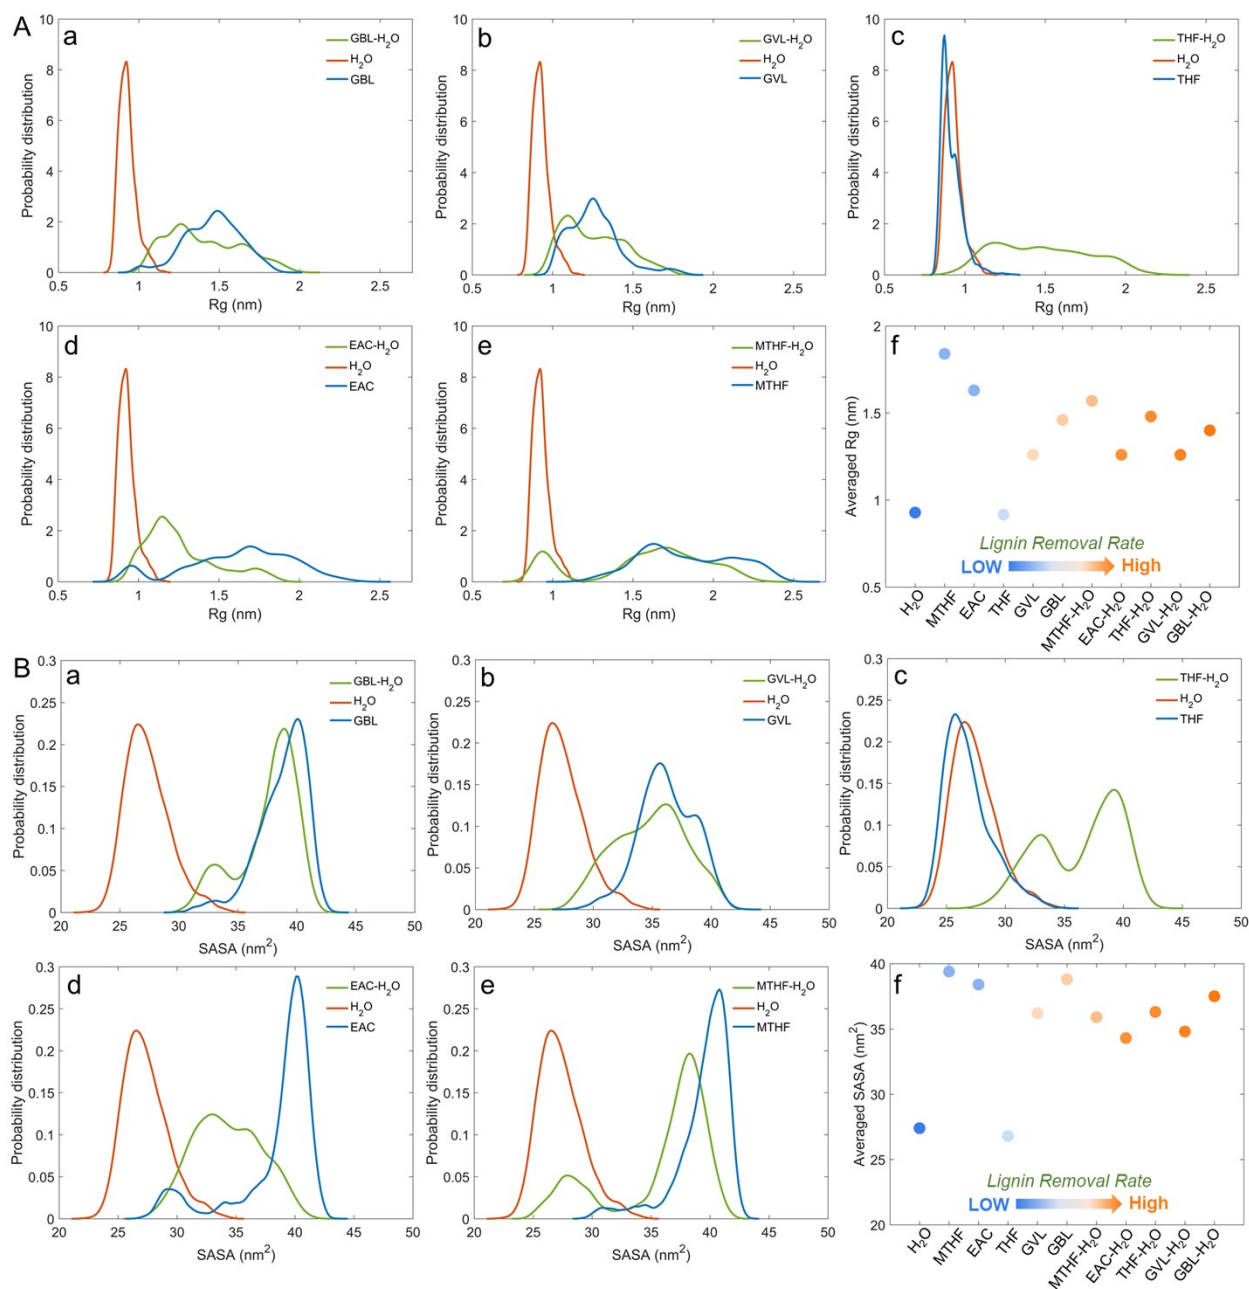

**Figure S9. A.** The probability distribution of Rg of lignin model chain LG5 in different solvents during 10 ns Production MD simulation. **B.** The probability distribution of SASA of lignin model chain LG5 in different solvents during 10 ns Production MD simulation. **a.** Organic part: GBL. **b.** Organic part: GVL. **c.** Organic part: THF. **d.** EAC. **e.** MTHF. The volume ratio of co-solvent was 7:3 (organic part: water). **f.** Averaged Rg/SASA in different solvent with the relative experimental lignin removal rate.

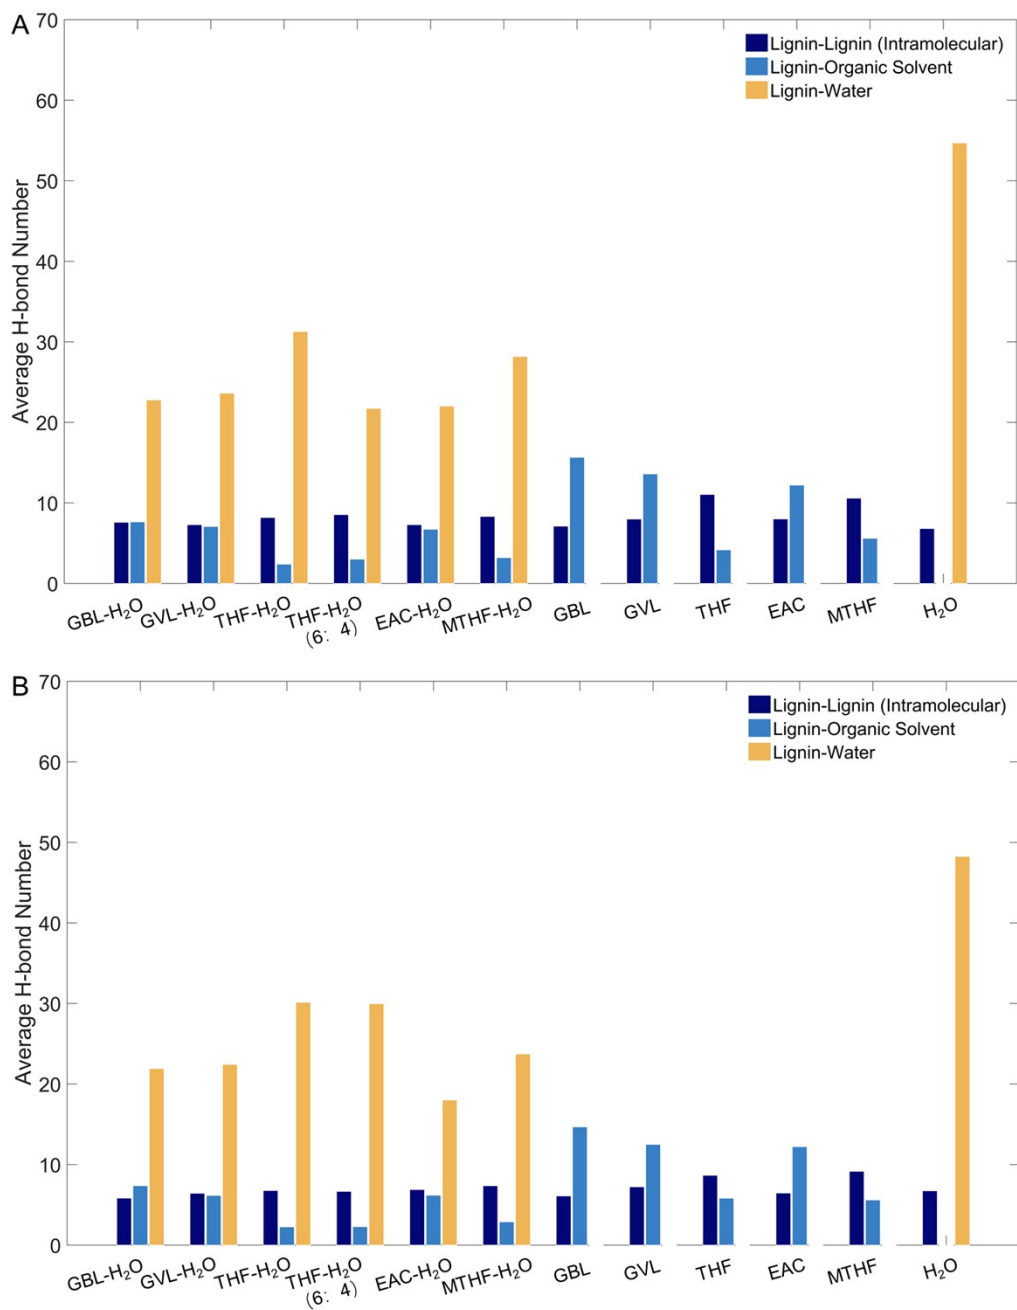

**Figure S10.** Average H-bond numbers of lignin models in different solvent. Dark blue for Lignin-Lignin. Blue for Lignin-Organic Part. Orange for Lignin-Water. **A.** LG2. **B.** LG3.

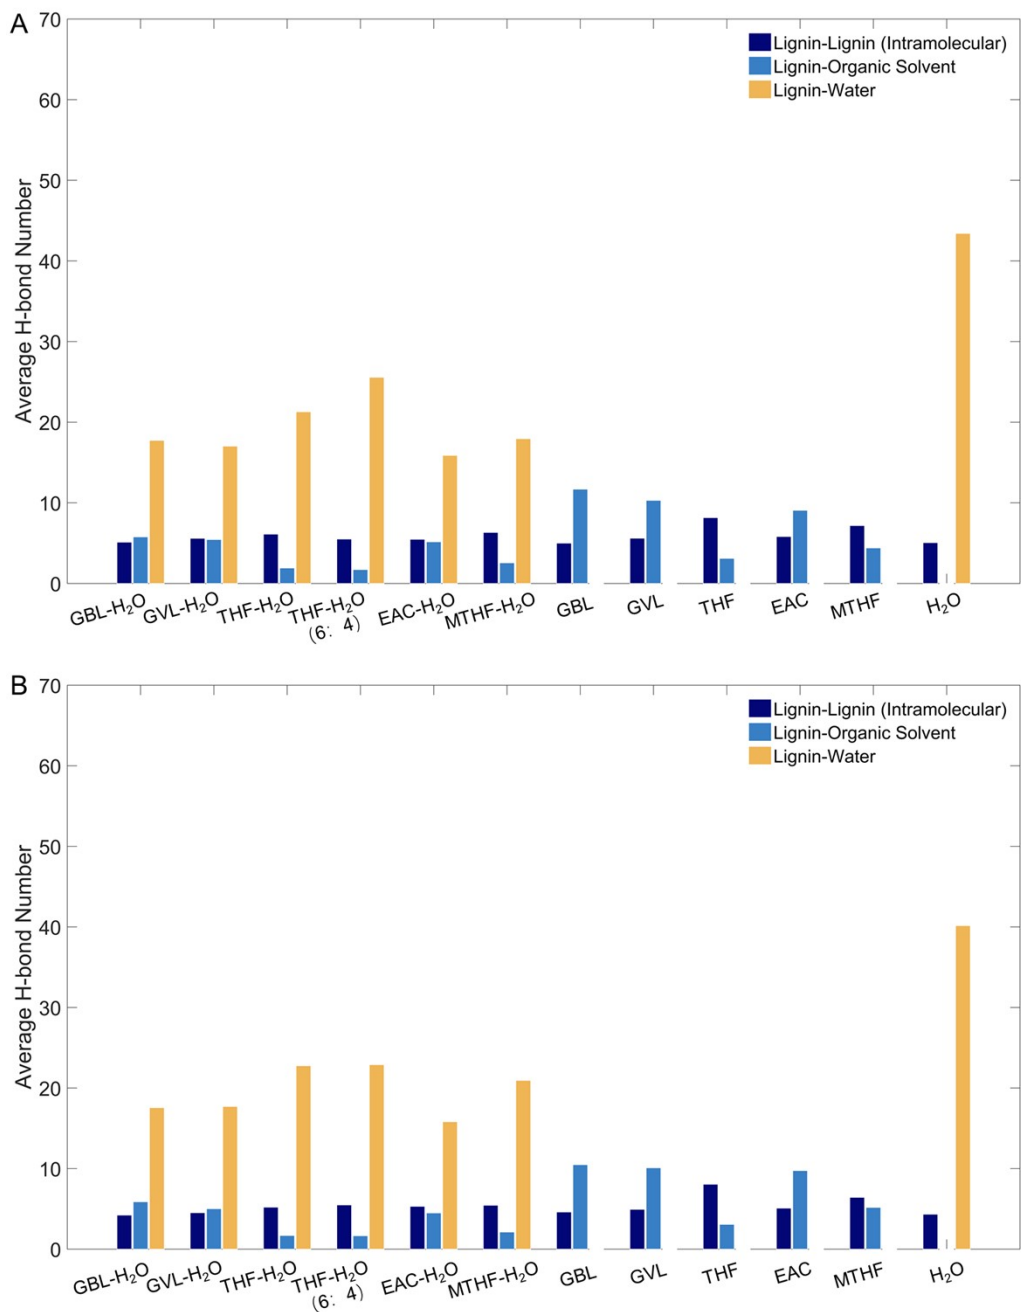

**Figure S11.** Average H-bond numbers of lignin models in different solvent. Dark blue for Lignin-Lignin. Blue for Lignin-Organic Part. Orange for Lignin-Water. **A.** LG4. **B.** LG5.

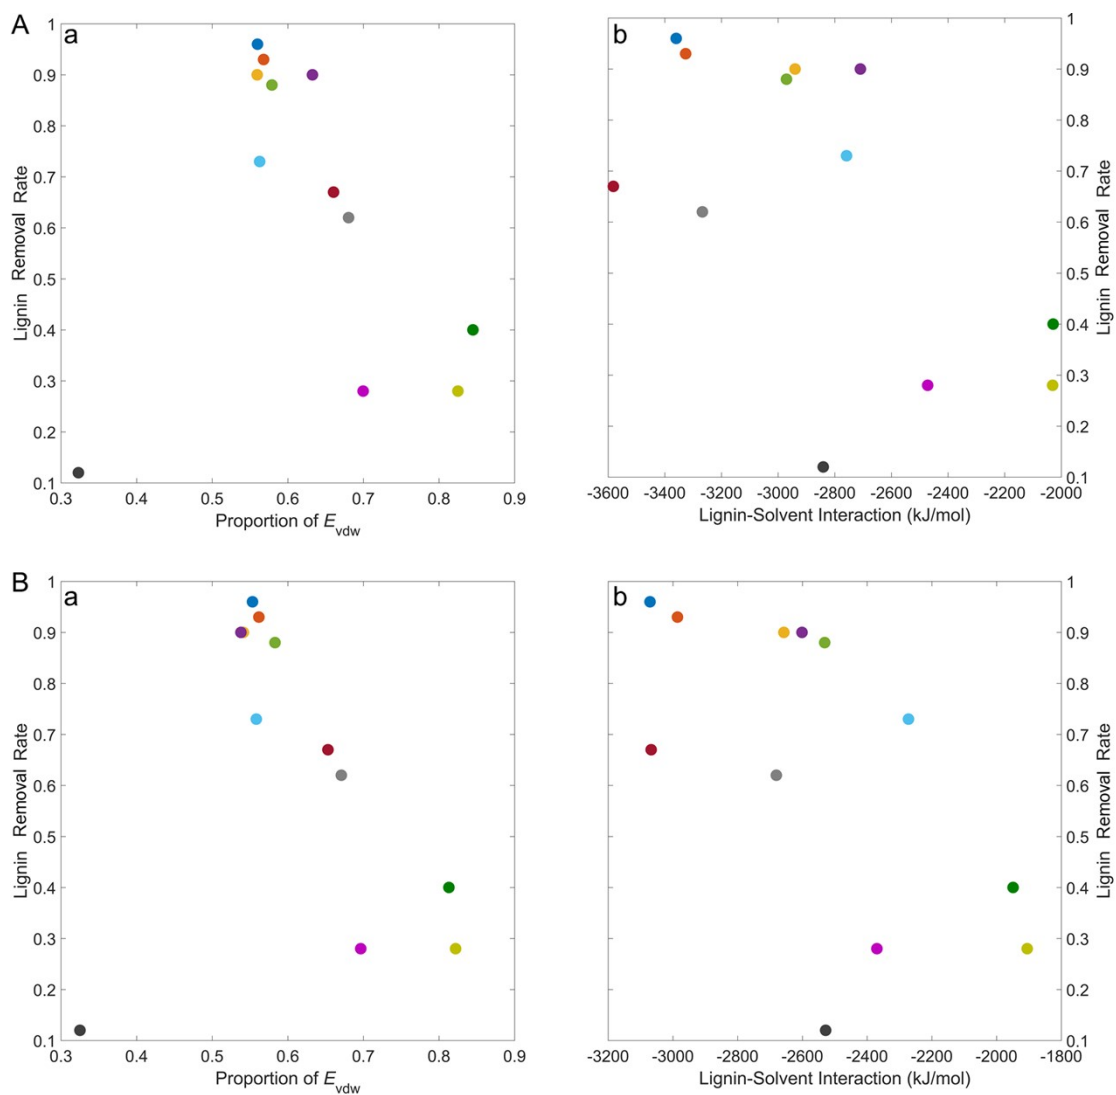

**Figure S12.** Lignin removal rate with proportion of  $E_{vdw}$  and lignin solvent interaction for lignin models. **A.** LG2. **B.** LG3 **a.** Proportion of  $E_{vdw}$ . **b.** Whole lignin solvent interaction.

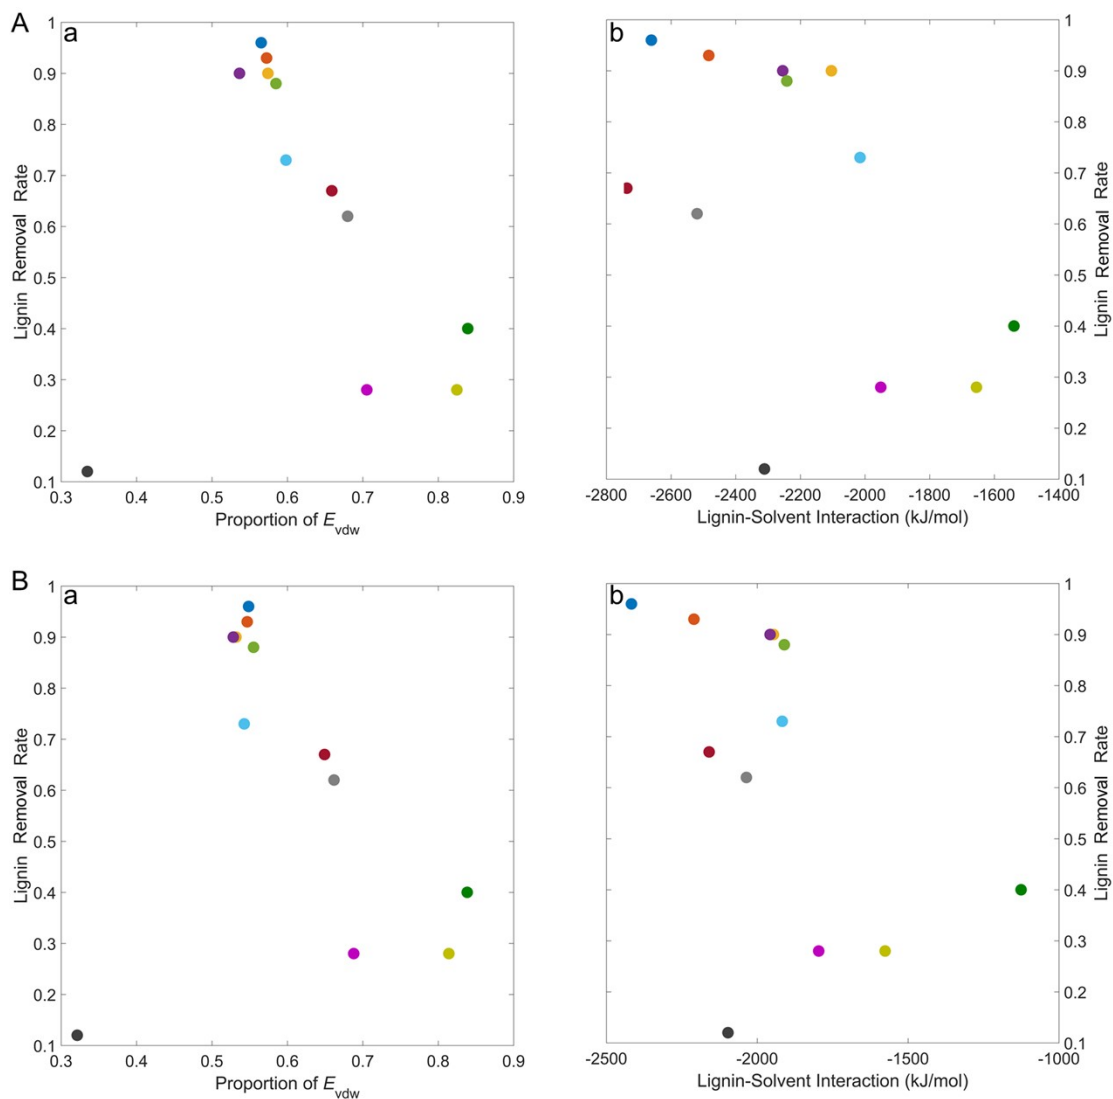

**Figure S13.** Lignin removal rate with proportion of  $E_{vdw}$  and lignin solvent interaction for lignin models. **A.** LG4. **B.** LG5 **a.** Proportion of  $E_{vdw}$ . **b.** Whole lignin solvent interaction.

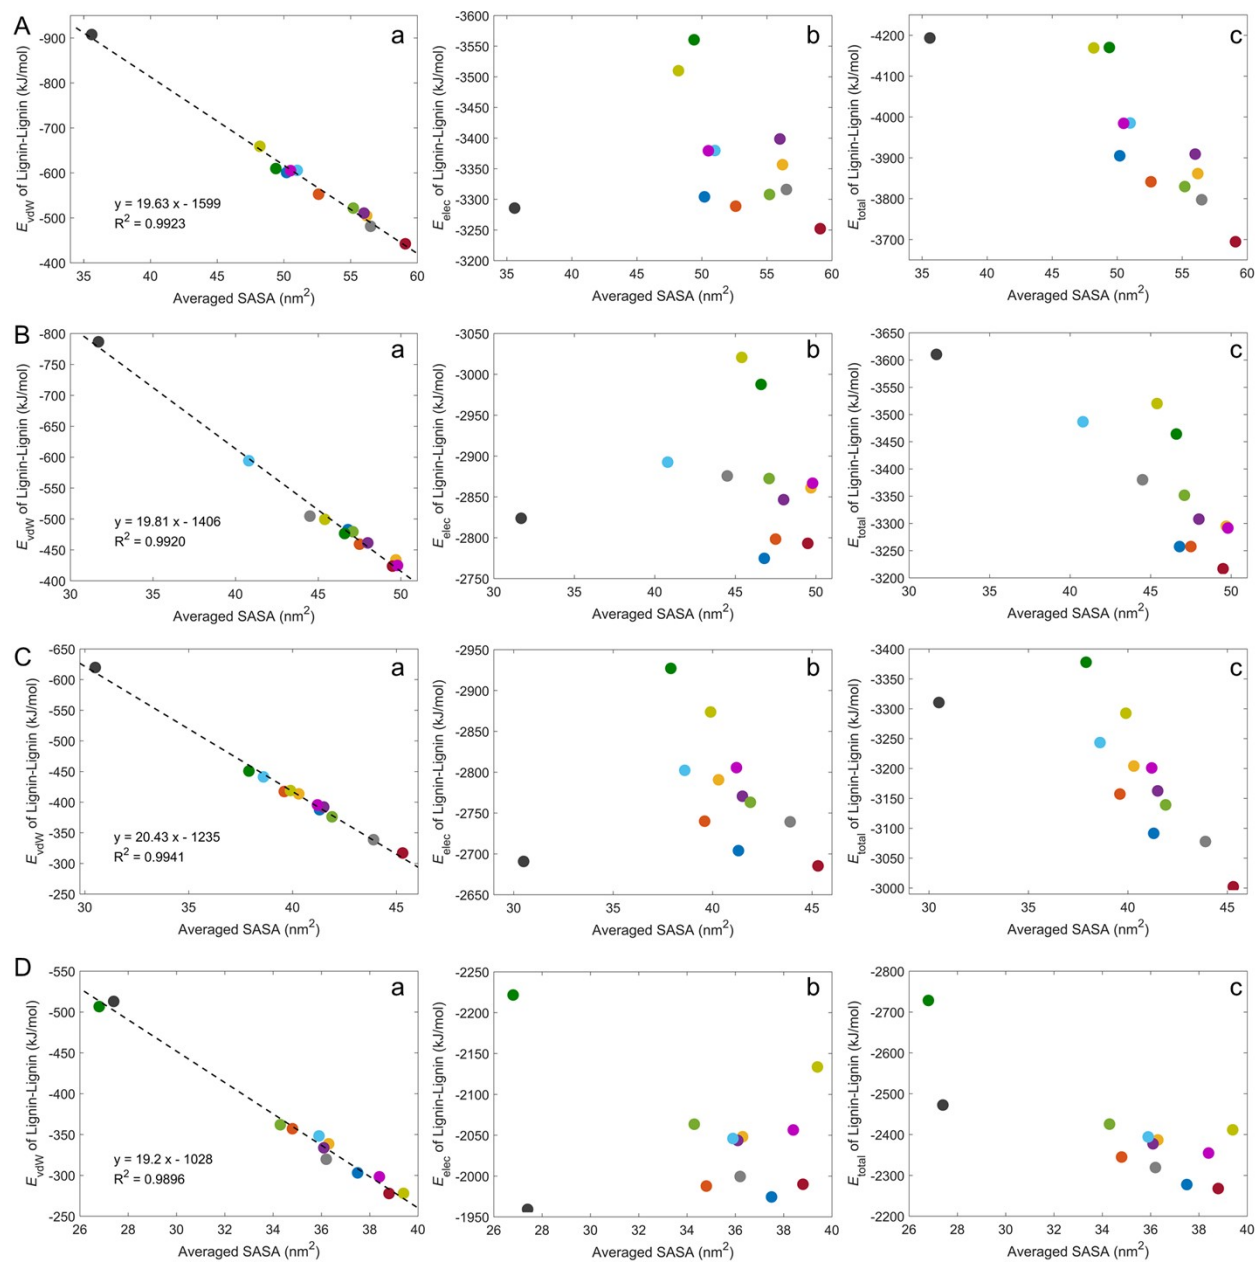

**Figure S14.** Relations between average solvent accessible surface areas (SASA) of lignin models and Lignin-Lignin Intramolecular interaction. **A.** LG2. **B.** LG3. **C.** LG4. **D.** LG5. **a.** Van der Waals. **b.** Electrostatic. **c.** Total.

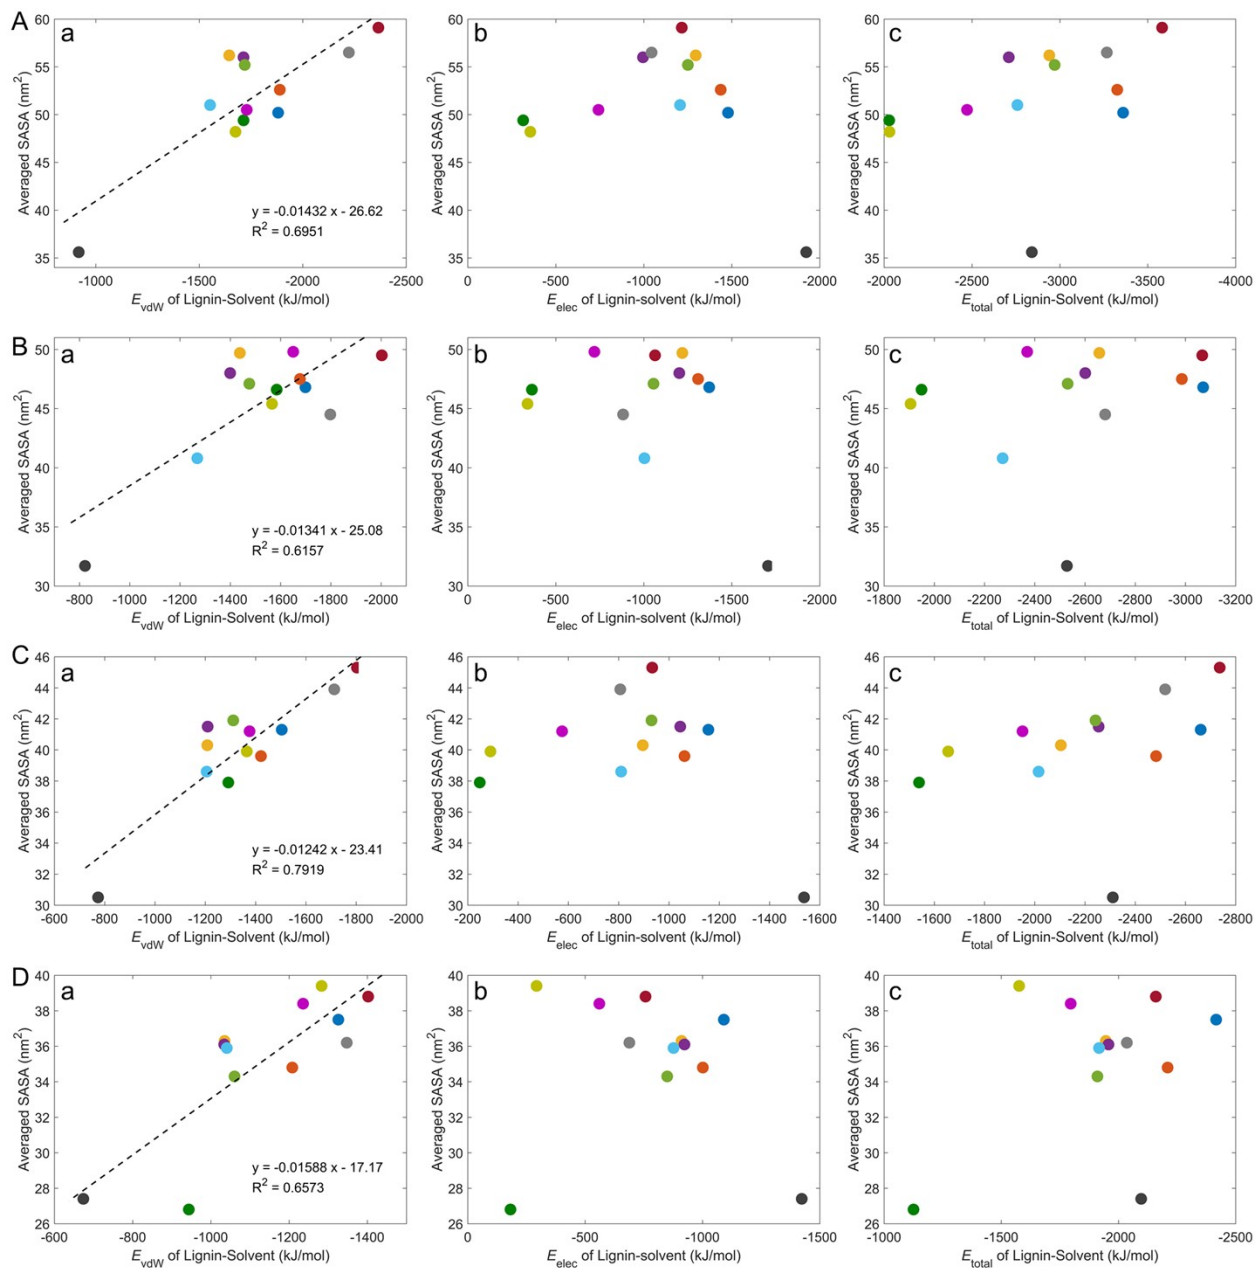

**Figure S15.** Relations between Lignin-Solvent interaction and average solvent accessible surface areas (SASA) of lignin models. **A.** LG2. **B.** LG3. **C.** LG4. **D.** LG5. **a.** Van der Waals. **b.** Electrostatic. **c.** Total.

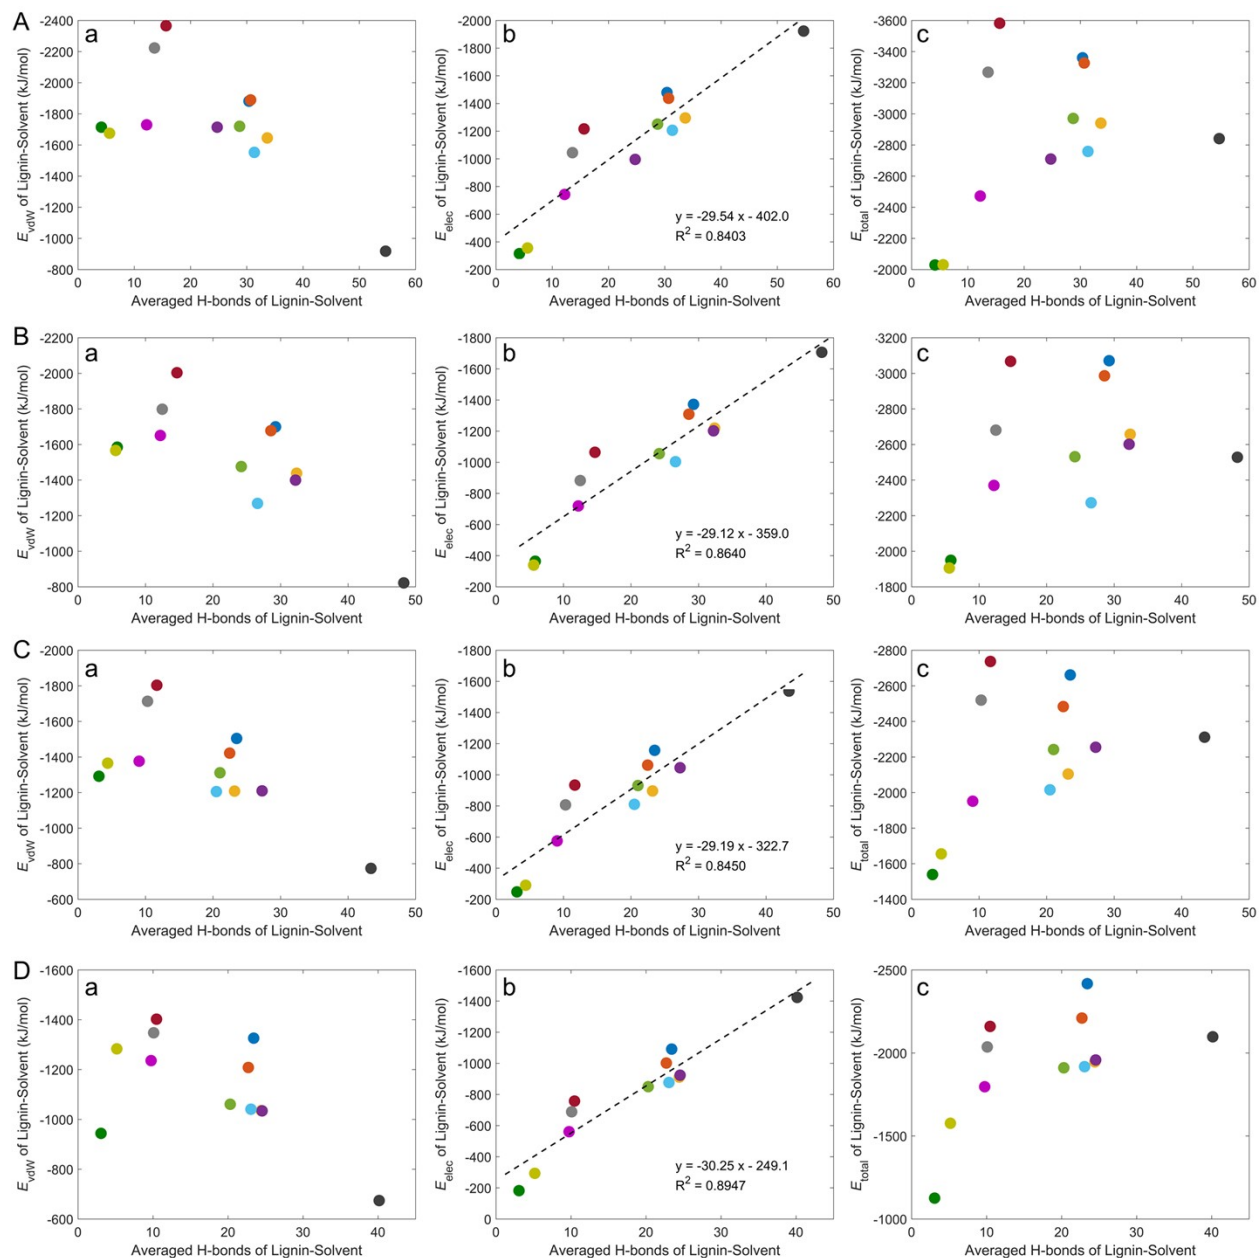

**Figure S16.** Relations between average number of Lignin-Solvent H-bond and Lignin-Solvent interaction of lignin models. **A.** LG2. **B.** LG3. **C.** LG4. **D.** LG5. **a.** Van der Waals. **b.** Electrostatic. **c.** Total.

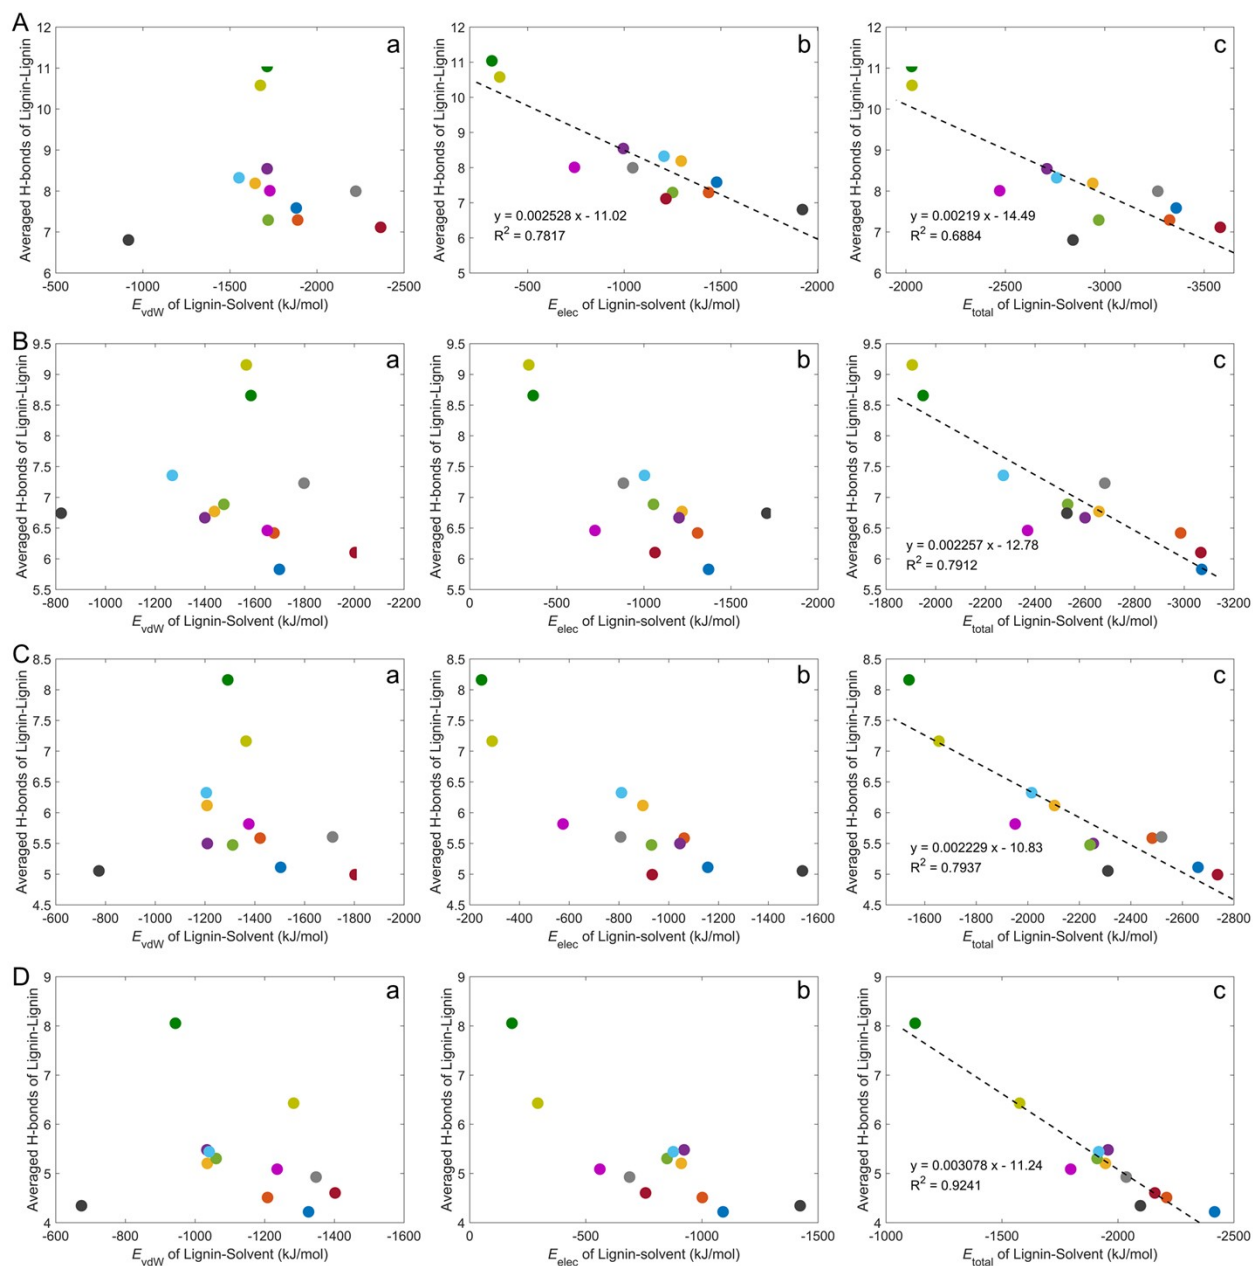

**Figure S17.** Relations between Lignin-Solvent interaction and average number of Lignin-Lignin intramolecular H-bond of lignin models. **A.** LG2. **B.** LG3. **C.** LG4. **D.** LG5. **a.** Van der Waals. **b.** Electrostatic. **c.** Total.

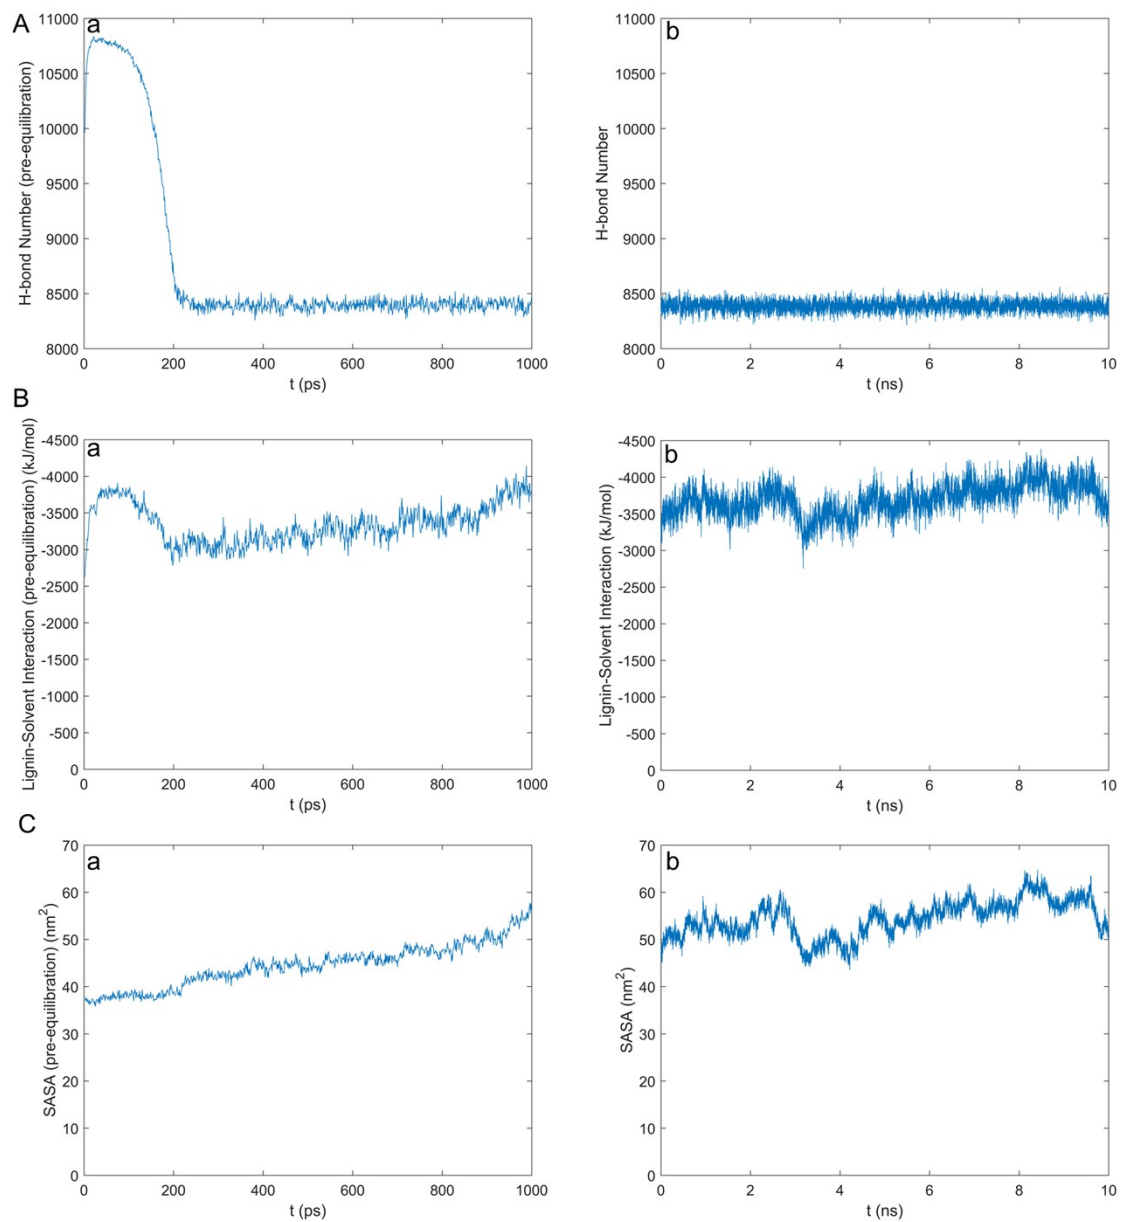

**Figure S18.** Detailed situation of LG1 in GBL-H<sub>2</sub>O solvent. A. H-bond analysis for whole system. B. Lignin-Solvent interaction. C. SASA of lignin. (a. pre-equilibration NPT. b. Production MD)

## Reference

1. Zhang, H.; Liu, X. D.; Li, J. M.; Jiang, Z. C.; Hu, C. W., Performances of Several Solvents on the Cleavage of Inter- and Intramolecular Linkages of Lignin in Corncob Residue. *ChemSusChem* **2018**, *11* (9), 1494-1504.
2. Jiang, Z. C.; He, T.; Li, J. M.; Hu, C. W., Selective conversion of lignin in corncob residue to monophenols with high yield and selectivity. *Green Chem.* **2014**, *16* (9), 4257-4265.
3. Ge, C. Y.; Zhao, J.; Zhang, R. Y.; Hu, C. W., Synergistic Effect of AlCl<sub>3</sub> and Glycerol/ChCl in the Conversion and Dissolution of Lignin in Three-Constituent Deep Eutectics. *ChemSusChem* **2025**, *18* (22).
